# Supplementary material for: Reversible mechanofluorochromism and acidochromism using a cyanostyrylbenzimidazole derivative with aggregation-induced emission
Source: Royal Society of Chemistry journal article supplement (doi:10.1039/c7ra09131a), 2017-01-01
Supplement: c7ra09131a1.pdf [file c7ra09131a1.pdf]

## Electronic Supplementary Information (ESI)

### Reversible mechanofluorochromism and acidochromism using a cyanostyrylbenzimidazole derivative with aggregation-induced emission

Yong Zhan,<sup>a</sup> Quanpeng Wei,<sup>a</sup> Jinyu Zhao<sup>b</sup> and Xiaojing Zhang<sup>\*a</sup>

<sup>a</sup> *Key Laboratory of Structure-Based Drug Design and Discovery, Ministry of Education, Shenyang Pharmaceutical University, Shenyang, 110016, P. R. China*

<sup>b</sup> *College of Chemistry, Jilin University, Changchun, 130012, P. R. China*

E-mail: [zhangxiaojing2046@126.com](mailto:zhangxiaojing2046@126.com).

Tel: +86-024-43520251

**Table S1.** Photophysical data of **TBM** in different solvents.

| Solvent     | $\lambda_{\text{abs}}$ (nm) | $\epsilon^{\text{max}}$ ( $\text{M}^{-1} \text{cm}^{-1}$ ) | $\lambda_{\text{em}}$ (nm) | $\Delta\nu_{\text{st}}^a$ ( $\text{cm}^{-1}$ ) | $\Phi_f^b$ |
|-------------|-----------------------------|------------------------------------------------------------|----------------------------|------------------------------------------------|------------|
| Hexane      | 296, 397                    | 28900                                                      | 490                        | 4781                                           | 0.010      |
| Cyclohexane | 296, 400                    | 28600                                                      | 491                        | 4633                                           | 0.016      |
| Toluene     | 295, 409                    | 26800                                                      | 510                        | 4842                                           | 0.019      |
| THF         | 295, 404                    | 29100                                                      | 524                        | 5669                                           | 0.004      |
| DCM         | 295, 412                    | 29100                                                      | 542                        | 5822                                           | 0.005      |
| DMF         | 295, 415                    | 26900                                                      | 551                        | 5948                                           | 0.011      |
| DMSO        | 296, 416                    | 27000                                                      | 560                        | 6181                                           | 0.012      |

<sup>a</sup> $\Delta\nu_{\text{st}} = \nu_{\text{abs}} - \nu_{\text{em}}$ ; <sup>b</sup>The fluorescence quantum yield ( $\Phi_f$ ) was measured using 9,10-diphenylanthracene ( $\Phi_f = 0.85$  in benzene,  $\lambda_{\text{ex}} = 390$  nm) as the standard.

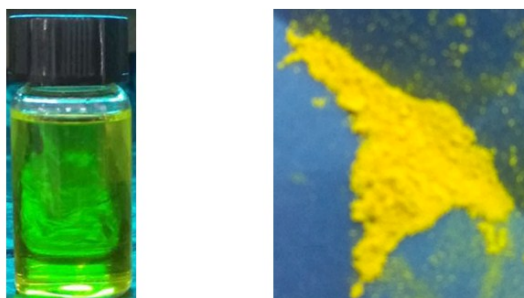**Fig. S1** Images of **TBM** in THF solution ( $10^{-5}$  M, left) and solid state (right) under 365 nm illumination.

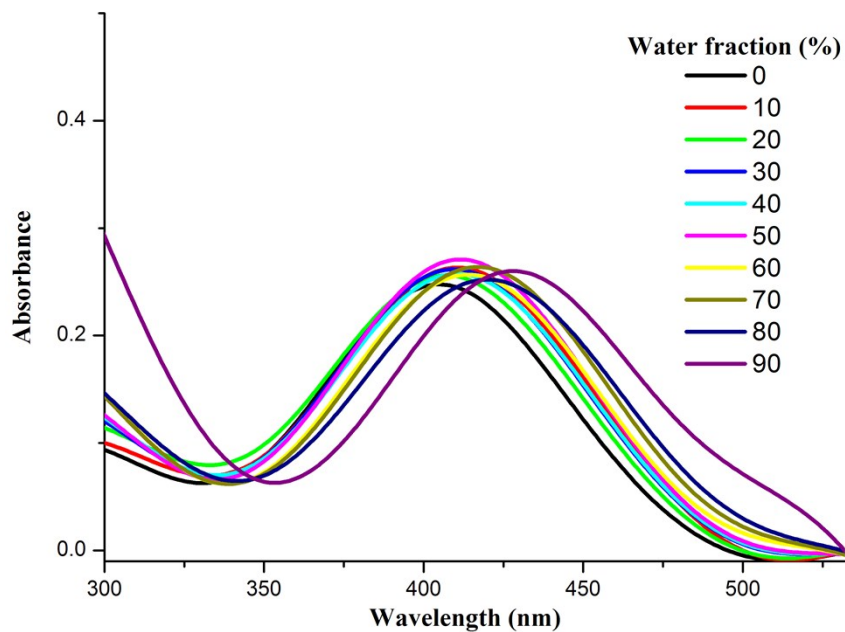

**Fig. S2** UV-Vis spectra of **TBM** in the mixtures of THF and water, and concentration is  $10^{-5}$  M.

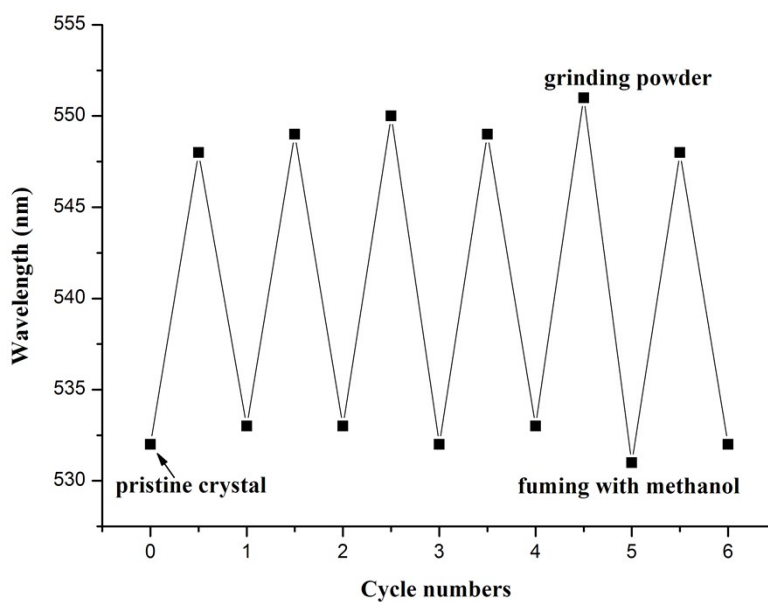

**Fig. S3** Maximum fluorescent emission of compound **TBM** upon repeating treatment by grinding and fuming with methanol vapor.

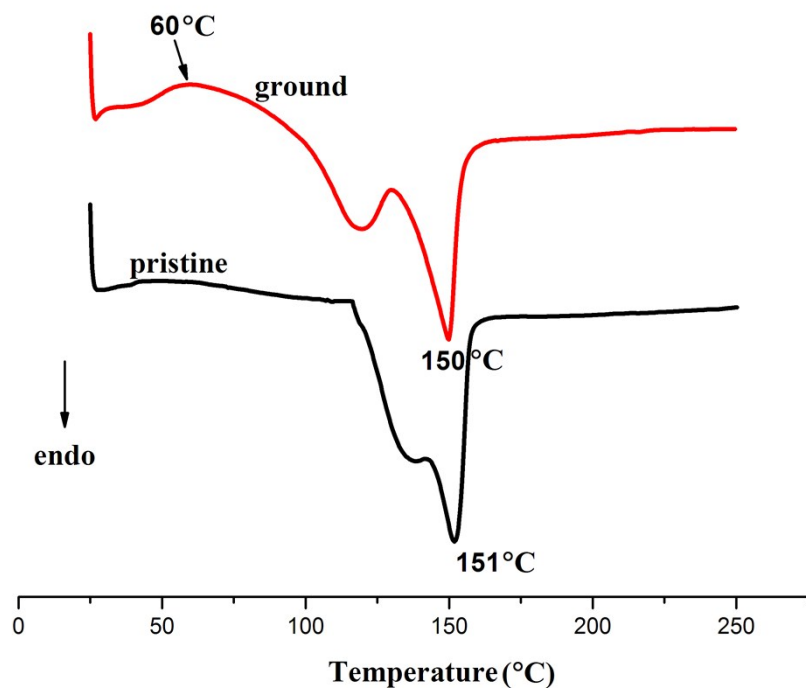

**Fig. S4** DSC curves of compound **TBM** in the pristine crystal and ground powder under nitrogen atmosphere at a heating rate at 10 °C/min.

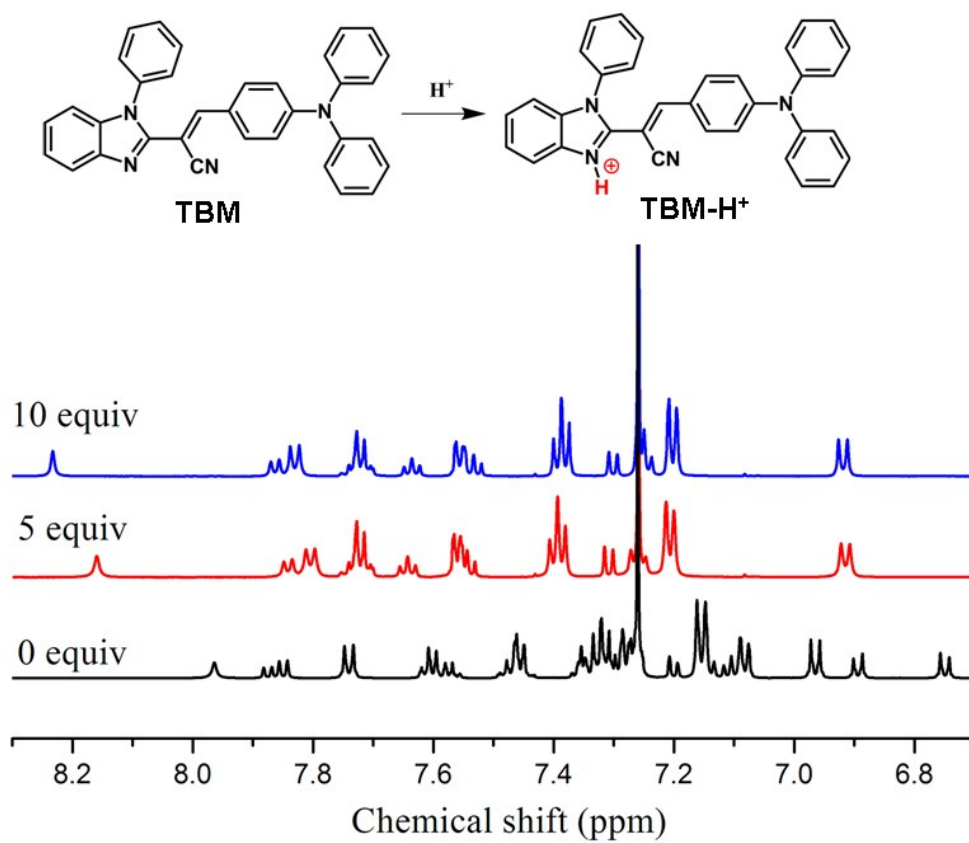

**Fig. S5**  $^1H$  NMR spectra of **TBM** in  $CDCl_3$  in the: absence (0 equiv) and presence of 5 equiv and 10 equiv of TFA.

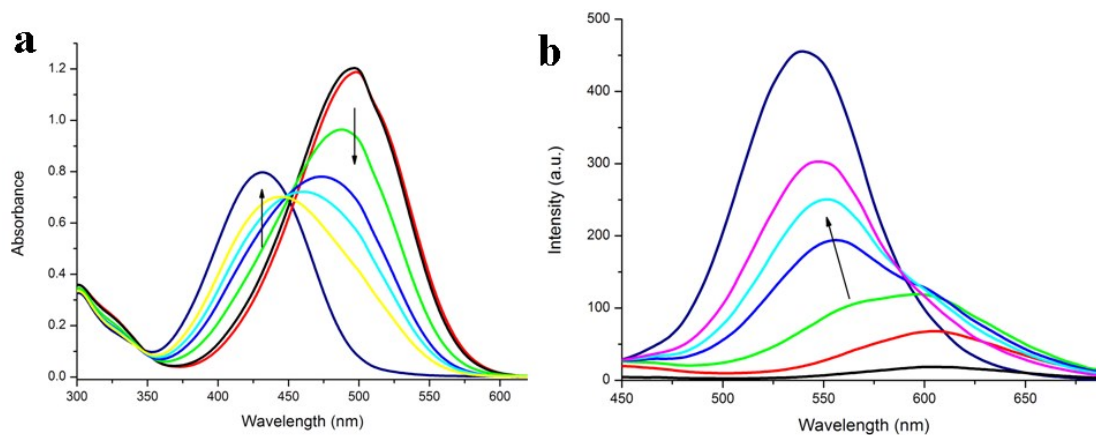

**Fig. S6** UV-vis absorption (a) and emission (b) spectral changes of **TBM** chloroform solution containing 500 equiv. TFA from 0 equiv. to 500 equiv. with additional TEA at room temperature. The concentration of **TBM** was maintained at  $2.5 \times 10^{-5}$  M; Excitation wavelength is 410 nm.

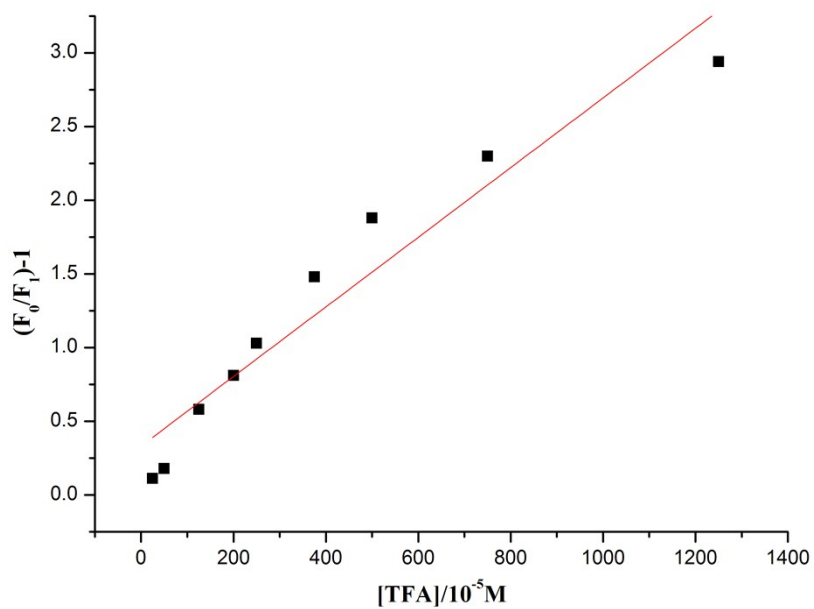

**Fig. S7** Stern-Volmer plot for **TBM** towards TFA in  $CHCl_3$ , the concentration of **TBM** was maintained at  $2.5 \times 10^{-5}$  M.

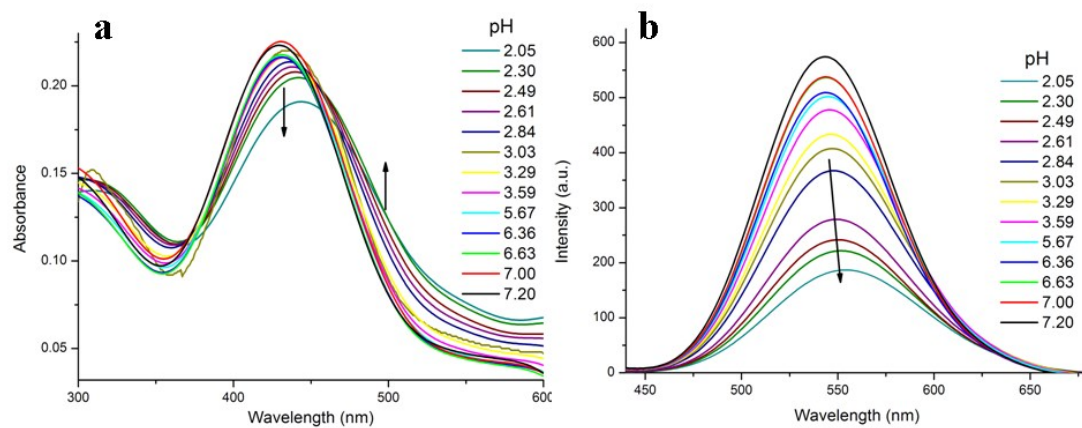

**Fig. S8** The changes of absorption (a) and emission (b) spectra in the THF/H<sub>2</sub>O (1:9, v/v) solution upon addition of H<sup>+</sup>.

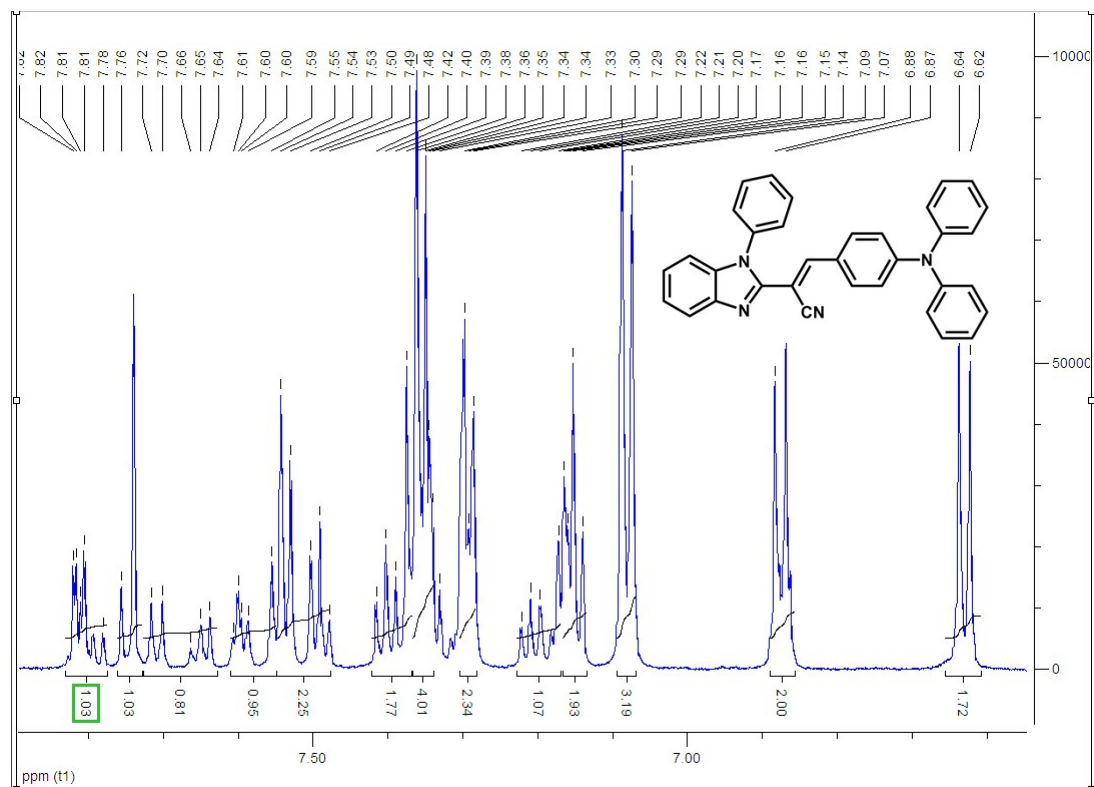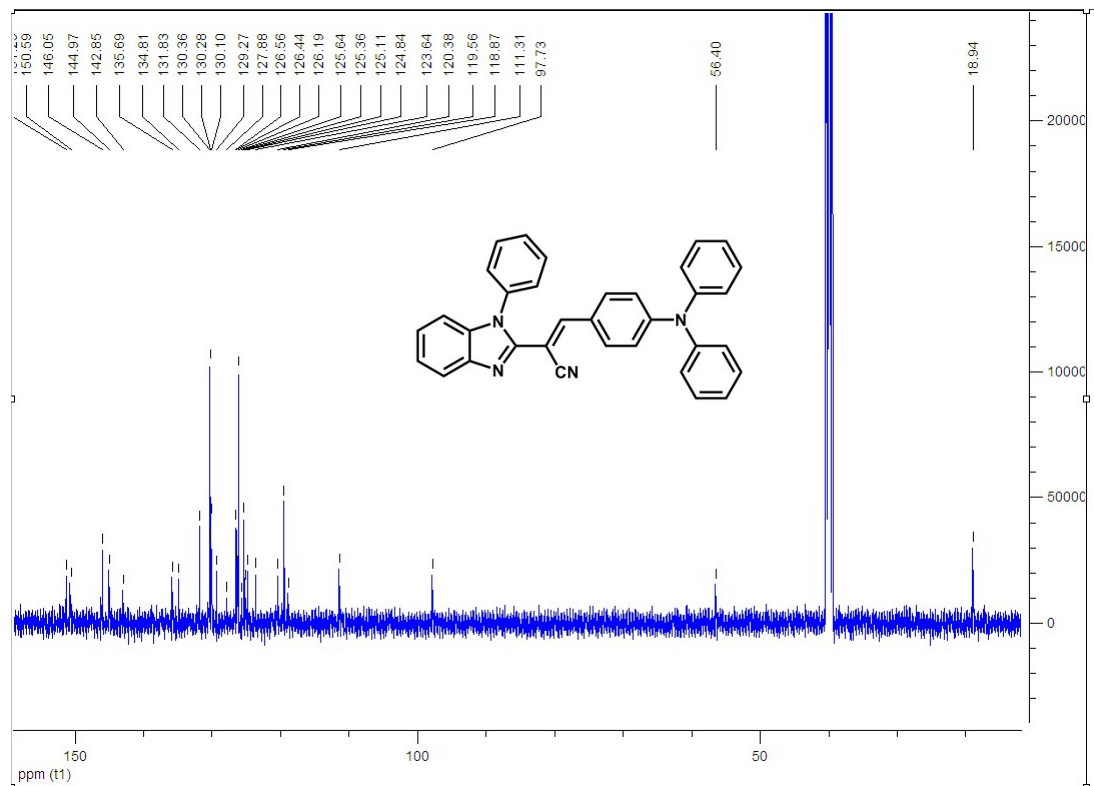



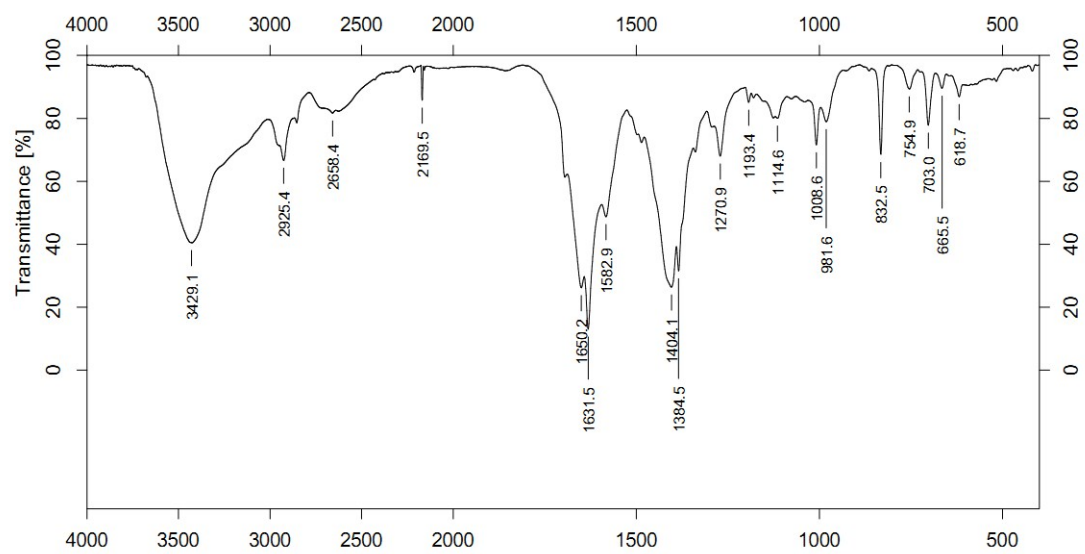

**Fig. S11** FT-IR spectrum of compound **TBM**.

## User Spectra

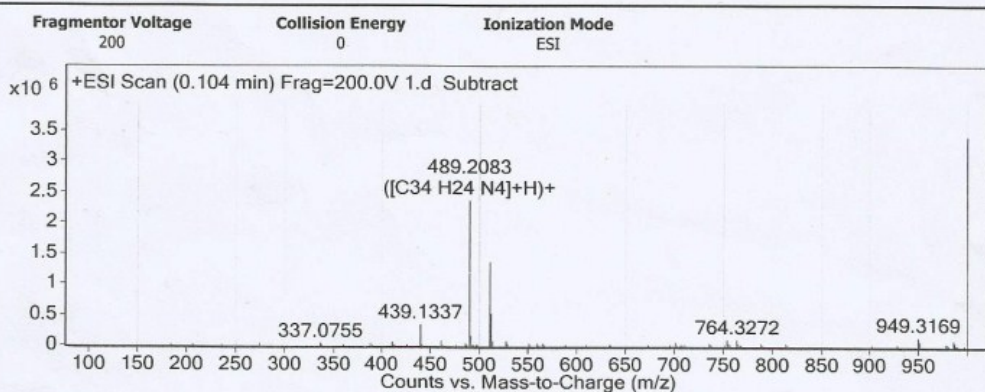

### Peak List

| m/z      | z | Abund      | Formula                                        | Ion                 |
|----------|---|------------|------------------------------------------------|---------------------|
| 439.1337 | 1 | 344047.47  |                                                |                     |
| 489.2083 | 1 | 2371546.75 | C <sub>34</sub> H <sub>24</sub> N <sub>4</sub> | (M+H) <sup>+</sup>  |
| 490.2125 | 1 | 870282.75  | C <sub>34</sub> H <sub>24</sub> N <sub>4</sub> | (M+H) <sup>+</sup>  |
| 491.2147 | 1 | 162961.77  | C <sub>34</sub> H <sub>24</sub> N <sub>4</sub> | (M+H) <sup>+</sup>  |
| 511.1911 | 1 | 1364347.75 | C <sub>34</sub> H <sub>24</sub> N <sub>4</sub> | (M+Na) <sup>+</sup> |
| 512.1944 | 1 | 527584.88  | C <sub>34</sub> H <sub>24</sub> N <sub>4</sub> | (M+Na) <sup>+</sup> |
| 754.2522 | 1 | 99309.31   |                                                |                     |
| 764.3272 | 1 | 104296.09  |                                                |                     |
| 949.3169 | 1 | 148879.36  |                                                |                     |
| 999.392  |   | 3417776.75 |                                                |                     |

### Formula Calculator Element Limits

| Element | Min | Max |
|---------|-----|-----|
| C       | 3   | 60  |
| H       | 0   | 120 |
| O       | 0   | 30  |
| N       | 0   | 30  |

### Formula Calculator Results

| Formula                                        | Best | Mass     | Tgt Mass | Diff (ppm) | Ion Species                                       | Score |
|------------------------------------------------|------|----------|----------|------------|---------------------------------------------------|-------|
| C <sub>34</sub> H <sub>24</sub> N <sub>4</sub> | TRUE | 488.2013 | 488.2001 | -2.54      | C <sub>34</sub> H <sub>25</sub> N <sub>4</sub>    | 95.53 |
| C <sub>34</sub> H <sub>24</sub> N <sub>4</sub> | TRUE | 488.2019 | 488.2001 | -3.61      | C <sub>34</sub> H <sub>24</sub> N <sub>4</sub> Na | 93.97 |

--- End Of Report ---

**Fig. S12** The HRMS spectrum of compound **TBM**.
